# Supplementary material for: Integrative bioinformatics analysis and experimental validation of key biomarkers driving the progression of cirrhotic portal hypertension
Source: PeerJ journal article supplement (doi:10.7717/peerj.19360), 2025-04-30
Supplement: IHCAOD_control_vs_CPH_.xls [file IHCAOD_control_vs_CPH_.xls]

## Sheet: Sheet1
OIT3	control	CPH	LOX1	control	CPH
Sample1	0.488869	0.395845	Sample1	0.365228	0.435217
Sample2	0.447372	0.424677	Sample2	0.396997	0.407316
Sample3	0.459159	0.42707	Sample3	0.345137	0.460284
Sample4	0.464213	0.424094	Sample4	0.370377	0.40992
Sample5	0.455761	0.414167	Sample5	0.364678	0.4343
Sample6	0.451072	0.42395	Sample6	0.383237	0.412473
