# Supplementary material for: Integrative bioinformatics analysis and experimental validation of key biomarkers driving the progression of cirrhotic portal hypertension
Source: PeerJ journal article supplement (doi:10.7717/peerj.19360), 2025-04-30
Supplement: MIQE_checklist.xls [file MIQE_checklist.xls]

## Sheet: Sheet1
ITEM TO CHECK	IMPORTANCE	CHECKLIST
EXPERIMENTAL DESIGN
Definition of experimental and control groups	E	See Methods——page6 line148-151
Number within each group	E	3 samples
Assay carried out by core lab or investigator's lab?	D	Investigator's lab
Acknowledgement of authors' contributions	D	Author contributions—page14 line 388-394
SAMPLE
Description	E	Liver Tissues
Volume/mass of sample processed	D
Microdissection or macrodissection	E	Not applicable
Processing procedure	E
If frozen - how and how quickly?	E	Yes, RNA frozen at -80 degrees immediately after isolation
If fixed - with what, how quickly?	E	Not applicable
Sample storage conditions and duration (especially for FFPE samples)	E	Stored at -80 degrees in RNAse-free water for 10-20days
NUCLEIC ACID EXTRACTION
Procedure and/or instrumentation	E
Name of kit and details of any modifications	E	Not applicable
Source of additional reagents used	D	TRIzol reagent
Details of DNase or RNAse treatment	E	RNA was resuspended in DEPC-treated water and treated with gDNase for efficient removal of genomic DNA following the manufacturer's recommendations,then performed reverse transcriptase reation
Contamination assessment (DNA or RNA)	E	Done by OD 260/280 determination
Nucleic acid quantification	E
Instrument and method	E	Nano-drop RNA extract
Purity (A260/A280)	D	Approximately1.8-2.0 for each sample
Yield	D
RNA integrity method/instrument	E	Not performed
RIN/RQI or Cq of 3' and 5' transcripts	E	Not performed
Electrophoresis traces	D	Not performed
Inhibition testing (Cq dilutions, spike or other)	E	Not performed
REVERSE TRANSCRIPTION
Complete reaction conditions	E	According to the manufacturer's Transcriptor First Strand cDNA Synthesis Kit (with gDNase, No. KR116, Tiangen Biotech, Beijing, China)
Amount of RNA and reaction volume	E	100ng in 20μl total
Priming oligonucleotide (if using GSP) and concentration	E	Not applicable
Reverse transcriptase and concentration	E	According to the manufacturer's recommendations
Temperature and time	E	According to the manufacturer's recommendations
Manufacturer of reagents and catalogue numbers	D	Transcriptor First Strand cDNA Synthesis Kit (with gDNase, No. KR116, Tiangen Biotech, Beijing, China)
Cqs with and without RT	D*	Not performed
Storage conditions of cDNA	D	Stored at -80 degrees in RNAse-free water
qPCR TARGET INFORMATION
If multiplex, efficiency and LOD of each assay.	E	Not applicable
Sequence accession number	E	lysyl oxidase like 1 [Homo sapiens (human)], Gene ID: 4016; oncoprotein induced transcript 3 [Homo sapiens (human)], Gene ID:170392
Location of amplicon	D
Amplicon length	E	LOXL1 product length = 70 ; OIT3 product length = 100
In silico specificity screen (BLAST, etc)	E	Yes, BLAST and UCSC Browser analysis performed
Pseudogenes, retropseudogenes or other homologs?	D	None
Sequence alignment	D
Secondary structure analysis of amplicon	D	Not performed
Location of each primer by exon or intron (if applicable)	E	LOXL1 Forward primer 1 CAGCAGACTTCCTCCCCAAC 20 Template 1614 ........................................... 1633 Reverse primer 1 CTGTGGTAATGCTGGTGGCA 20 Template 1683 ........................................ 1664 OIT3 Forward primer 1 GCCACTCTTGCCTTGGATCT 20 Template 764 ........................................ 783 Reverse primer 1 CACAACACAGGGACTTGGCA 20 Template 863 ..............................…
What splice variants are targeted?	E	None
qPCR OLIGONUCLEOTIDES
Primer sequences	E	See Table 1
RTPrimerDB Identification Number	D	Not applicable
Probe sequences	D**	Not applicable
Location and identity of any modifications	E	None
Manufacturer of oligonucleotides	D	Sangon Biotech
Purification method	D	HAP, by manufacturer (Sangon Biotech)
qPCR PROTOCOL
Complete reaction conditions	E	According to the manufacturer's FastReal qPCR PreMix (Tiangen, FP217, China)
Reaction volume and amount of cDNA/DNA	E	2μl of cDNA prep in 25μl total volumne
Primer, (probe), Mg++ and dNTP concentrations	E	10 umoles of each primer into 25μl total as above
Polymerase identity and concentration	E	According to the manufacturer's FastReal qPCR PreMix (Tiangen, FP217, China)
Buffer/kit identity and manufacturer	E	According to the manufacturer's FastReal qPCR PreMix (Tiangen, FP217, China)
Exact chemical constitution of the buffer	D
Additives (SYBR Green I, DMSO, etc.)	E	12.5μl of SYBR-green in 25μl total
Manufacturer of plates/tubes and catalog number	D
Complete thermocycling parameters	E	See Methods——page6 line158-159
Reaction setup (manual/robotic)	D
Manufacturer of qPCR instrument	E	Applied Biosystems
qPCR VALIDATION
Evidence of optimisation (from gradients)	D	None
Specificity (gel, sequence, melt, or digest)	E	Agarose gel to see single band for GAPDH control
For SYBR Green I, Cq of the NTC	E	Done
Standard curves with slope and y-intercept	E	Not performed
PCR efficiency calculated from slope	E	Not performed
Confidence interval for PCR efficiency or standard error	D	Standard Error
r2 of standard curve	E	Not performed
Linear dynamic range	E	Yes
Cq variation at lower limit	E	Not performed
Confidence intervals throughout range	D	Not performed
Evidence for limit of detection	E	Not performed
If multiplex, efficiency and LOD of each assay.	E	Not applicable
DATA ANALYSIS
qPCR analysis program (source, version)	E	Applied Biosystems QuantStudio 5
Cq method determination	E	Threshold Method
Outlier identification and disposition	E	Not performed
Results of NTCs	E	No amplification
Justification of number and choice of reference genes	E	See Methods——page6 line160-161
Description of normalisation method	E	See Methods——page6 line159-160
Number and concordance of biological replicates	D	3
Number and stage (RT or qPCR) of technical replicates	E	3
Repeatability (intra-assay variation)	E	< 1.5%
Reproducibility (inter-assay variation, %CV)	D	Presented in Figures as Standard
Power analysis	D	Not performed
Statistical methods for result significance	E	Unpaired t test
Software (source, version)	E	GraphPad Prism 10
Cq or raw data submission using RDML	D	Not done
Table 1. MIQE checklist for authors, reviewers and editors. All essential information (E) must be submitted with the manuscript. Desirable
information (D) should be submitted if available. If using primers obtained from RTPrimerDB, information on qPCR target, oligonucleotides,
protocols and validation is available from that source.
*: Assessing the absence of DNA using a no RT assay is essential when first extracting RNA. Once the sample has been validated as
RDNA-free, inclusion of a no-RT control is desirable, but no longer essential.
**: Disclosure of the probe sequence is highly desirable and strongly encouraged. However, since not all commercial pre-designed assay
vendors provide this information, it cannot be an essential requirement. Use of such assays is advised against.
